# Supplementary material for: Achieving High-Strength and Toughness in a Mg-Gd-Y Alloy Using Multidirectional Impact Forging
Source: MDPI journal article supplement (doi:10.3390/ma15041508), 2022-02-17
Supplement: s1 [file s1]

## Article

# Achieving High-Strength and Toughness in a Mg-Gd-Y Alloy Using Multidirectional Impact Forging

Songhe Lu <sup>1,2,†</sup>, Di Wu <sup>2,†</sup>, Ming Yan <sup>1</sup> and Rongshi Chen <sup>2,\*</sup>

<sup>1</sup> Academy for Advanced Interdisciplinary Studies, Southern University of Science and Technology, Shenzhen 518055, China; lush3@sustech.edu.cn (S.L.); yanm@sustech.edu.cn (M.Y.)

<sup>2</sup> Shi-changxu Innovation Center for Advanced Materials, Institute of Metal Research, Chinese Academy of Sciences, 72 Wenhua Road, Shenyang 110016, China; dwu@imr.ac.cn

\* Correspondence: rschen@imr.ac.cn; Tel.: +86-24-23926646; Fax: +86-24-23894149

† These authors contributed equally to this work.

## Elektron Wrought Alloys

| Typical chemical composition – major alloying elements % | Elektron alloy                  | Tensile properties <sup>a</sup> |                        |                             | Compressive properties  |                            | Fatigue properties <sup>b</sup> |               | Hardness | Description                                                                                              |
|----------------------------------------------------------|---------------------------------|---------------------------------|------------------------|-----------------------------|-------------------------|----------------------------|---------------------------------|---------------|----------|----------------------------------------------------------------------------------------------------------|
|                                                          |                                 | 0.2% proof stress (MPa)         | Tensile strength (MPa) | Elongation <sup>c</sup> (%) | 0.2% proof stress (MPa) | Compressive strength (MPa) | Unnotched (MPa)                 | Notched (MPa) | v.p.n.   |                                                                                                          |
| Y 5.25<br>Nd 3.5 <sup>a</sup><br>Zr 0.5                  | WE54 Extruded bars and sections |                                 |                        |                             |                         |                            |                                 |               |          |                                                                                                          |
|                                                          | Precipitation treated           | (180)                           | (280)                  | (6)                         | –                       | –                          | –                               | –             | 75–95    | High strength at elevated temperatures particularly in the fully heat treated condition.                 |
|                                                          | Fully heat treated              | (160)                           | (250)                  | (6)                         | –                       | –                          | –                               | –             | 75–95    |                                                                                                          |
|                                                          | Forgings <sup>d</sup>           |                                 |                        |                             |                         |                            |                                 |               |          |                                                                                                          |
|                                                          | Precipitation treated           | (165)                           | (310)                  | (4)                         | –                       | –                          | –                               | –             | –        |                                                                                                          |
| Y 4.0<br>Nd 3.0 <sup>a</sup><br>Zr 0.5                   | WE43 Extruded bars              |                                 |                        |                             |                         |                            |                                 |               |          |                                                                                                          |
|                                                          | Precipitation treated           | (160)                           | (245)                  | (6)                         | –                       | –                          | –                               | –             | 75–95    | High strength aerospace alloy at elevated temperatures particularly in the fully heat treated condition. |
|                                                          | Fully heat treated              | (130)                           | (230)                  | (7)                         | –                       | –                          | –                               | –             | 75–95    |                                                                                                          |
|                                                          | Forgings <sup>d</sup>           |                                 |                        |                             |                         |                            |                                 |               |          |                                                                                                          |
|                                                          | Precipitation treated           | (155)                           | (285)                  | (6)                         | –                       | –                          | –                               | –             | –        |                                                                                                          |
|                                                          | Fully heat treated              | (165)                           | (265)                  | (6)                         | –                       | –                          | –                               | –             | –        |                                                                                                          |

**Figure S1.** Room temperature tensile properties of extruded bars and forged billets of commercial WE43 and WE54 alloys produced by Elektron Ltd (London, UK).

## Magnesium Elektron Elektron® 43 Magnesium Wrought Alloy

Categories: [Metal](#); [Nonferrous Metal](#); [Magnesium Alloy](#)

**Material Notes:** High strength wrought Mg alloy available as rolled plate, forging feedstock, and extrusions. It is a wrought evolution of the casting alloy Elektron WE43. Elektron 43 uses zirconium grain refining and has successfully undergone flammability tests by the FAA for use in aircraft seat frames. It develops maximum strength in the T5 condition.

**Vendors:** Magnesium Elektron is the world leader in high strength magnesium alloys in rolled, extruded and cast forms. Phone (303) 589-3189 or visit [www.magnesium-elektron.com](http://www.magnesium-elektron.com).

[Click here to view all available suppliers for this material.](#)

Please [click here](#) if you are a supplier and would like information on how to add your listing to this material.

| Physical Properties     | Metric                                                                | English                                     | Comments                    |
|-------------------------|-----------------------------------------------------------------------|---------------------------------------------|-----------------------------|
| Density                 | 1.84 g/cc                                                             | 0.0665 lb/in <sup>3</sup>                   |                             |
| Mechanical Properties   | Metric                                                                | English                                     | Comments                    |
| Hardness, Brinell       | 70 - 90                                                               | 70 - 90                                     |                             |
| Tensile Strength        | 296 MPa                                                               | 43000 psi                                   | Extruded Bar - Transverse   |
|                         | 331 MPa                                                               | 48000 psi                                   | Extruded Bar - Longitudinal |
|                         | 345 MPa                                                               | 50000 psi                                   | Rolled Plate                |
|                         | @Thickness 1.02 - 38.1 mm @Thickness 0.0400 - 1.50 in                 |                                             |                             |
|                         | 345 MPa                                                               | 50000 psi                                   | Rolled Plate                |
|                         | @Thickness 38.13 - 76.2 mm @Thickness 1.501 - 3.00 in                 |                                             |                             |
| Tensile Strength, Yield | 179 MPa                                                               | 26000 psi                                   | Extruded Bar - Transverse   |
|                         | @Strain 0.200 %                                                       | @Strain 0.200 %                             |                             |
|                         | 214 MPa                                                               | 31000 psi                                   | Extruded Bar - Longitudinal |
|                         | @Strain 0.200 %                                                       | @Strain 0.200 %                             |                             |
|                         | 255 MPa                                                               | 37000 psi                                   | Rolled Plate                |
|                         | @Strain 0.200 %, Thickness 38.13 - 76.2 mm @Thickness 1.501 - 3.00 in | @Strain 0.200 %, Thickness 1.501 - 3.00 in  |                             |
|                         | 276 MPa                                                               | 40000 psi                                   | Rolled Plate                |
|                         | @Strain 0.200 %, Thickness 1.02 - 38.1 mm @Thickness 0.0400 - 1.50 in | @Strain 0.200 %, Thickness 0.0400 - 1.50 in |                             |
| Elongation at Break     | 11 %                                                                  | 11 %                                        | Extruded Bar - Transverse   |
|                         | 14 %                                                                  | 14 %                                        | Extruded Bar - Longitudinal |
|                         | 12 %                                                                  | 12 %                                        | Rolled Plate                |
|                         | @Thickness 1.02 - 38.1 mm @Thickness 0.0400 - 1.50 in                 |                                             |                             |
|                         | 14 %                                                                  | 14 %                                        | Rolled Plate                |
|                         | @Thickness 38.13 - 76.2 mm @Thickness 1.501 - 3.00 in                 |                                             |                             |

**Figure S2.** Room temperature tensile properties of rolled plate and extruded bar of commercial WE43 alloys produced by Elektron Ltd (London, UK).
